# Supplementary material for: A reduction and pH dual-sensitive nanodrug for targeted theranostics in hepatocellular carcinoma
Source: Royal Society of Chemistry journal article supplement (doi:10.1039/d0bm00295j), 2020-01-01
Supplement: d0bm00295j1.pdf [file d0bm00295j1.pdf]

## Supplementary Information

### **A reduction and pH dual-sensitive nanodrug for targeted theranostics in hepatocellular carcinoma**

Mingyue Cai,<sup>‡a</sup> Bo Li,<sup>‡b</sup> Liteng Lin,<sup>‡a</sup> Jingjun Huang,<sup>a</sup> Yongcheng An,<sup>a</sup> Wensou Huang,<sup>a</sup> Zhimei Zhou,<sup>a</sup> Yong Wang,<sup>c</sup> Xintao Shuai<sup>\*b</sup> and Kangshun Zhu<sup>\*a</sup>

*<sup>a</sup>Laboratory of Interventional Radiology, Department of Minimally Invasive Interventional Radiology, and Department of Radiology, the Second Affiliated Hospital of Guangzhou Medical University, Guangzhou, 510260, China.*

*E-mail: zhksh010@163.com; Tel: +86-20-34156205*

*<sup>b</sup>PCFM Lab of Ministry of Education, School of Materials Science and Engineering, Sun Yat-sen University, Guangzhou, 510275, China.*

*E-mail: shuaixt@mail.sysu.edu.cn; Fax: +86-20-84112245; Tel: +86-20-84110365*

*<sup>c</sup>College of Chemistry and Materials Science, Jinan University, Guangzhou, 510632, China.*

*‡*These authors contributed equally.

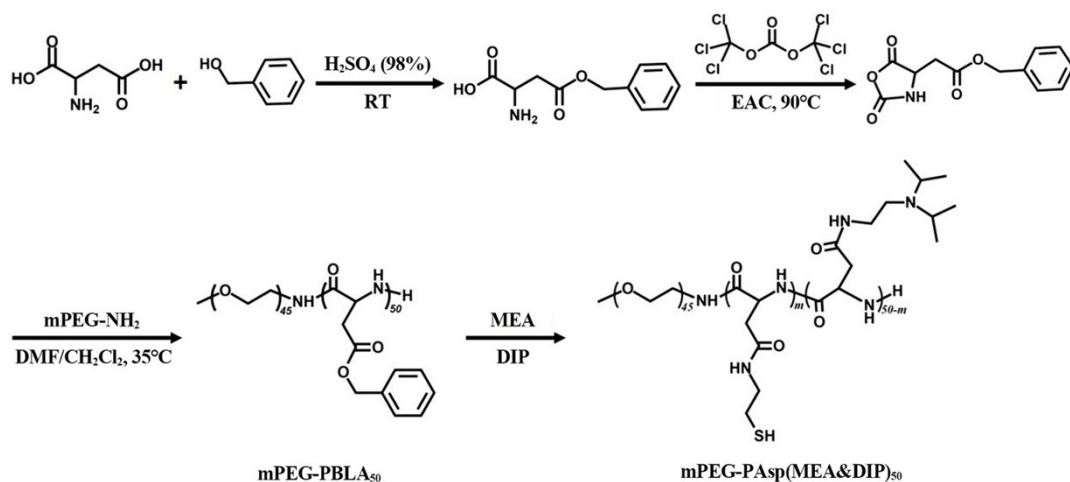

**Fig. S1** Synthetic route of the diblock copolymer  $\text{mPEG-PAsp(MEA\&DIP)}$ .

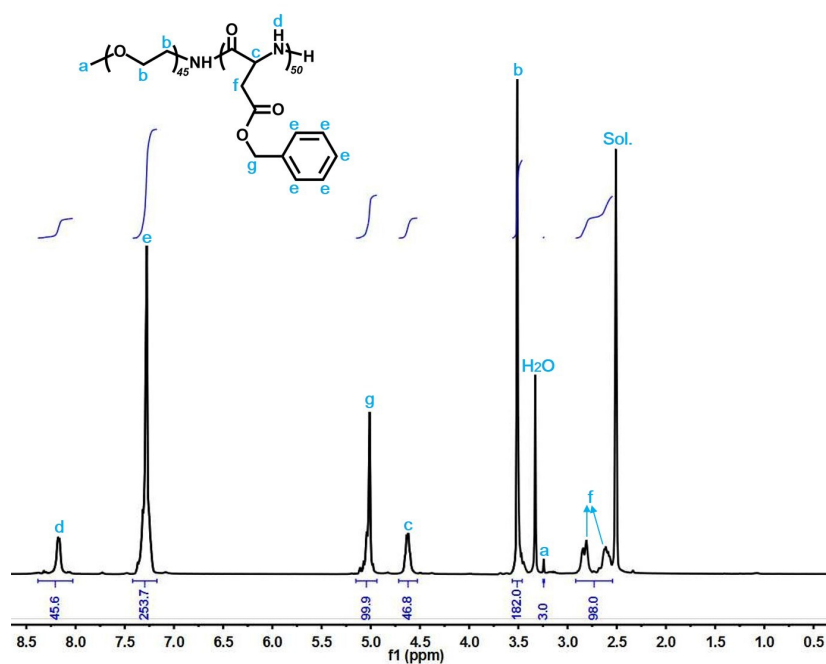

**Fig. S2**  $^1\text{H}$  NMR spectrum of  $\text{mPEG}_{2k}\text{-PBLA}_{50}$  in  $\text{DMSO-d}_6$ . Characteristic peaks as follows:  $^1\text{H}$  NMR (400 MHz,  $\text{DMSO-d}_6$ , 298 K):  $\delta$  (ppm) = 2.52 - 2.88 ppm ( $-\text{CH}_2\text{COOCH}_2\text{Ph}$ , f), 3.24 ppm ( $\text{CH}_3(\text{OCH}_2\text{CH}_2)\text{NH}-$ , a), 3.50 ppm ( $\text{CH}_3(\text{OCH}_2\text{CH}_2)\text{NH}-$ , b), 4.62 ppm ( $-\text{CH}-$  of the main chain, c), 5.00 ppm ( $-\text{CH}_2\text{COOCH}_2\text{Ph}$ , g), 7.27 ppm ( $-\text{CH}-$  of benzyl group, e), 8.16 ppm ( $-\text{NH}-$  of the main chain, d).

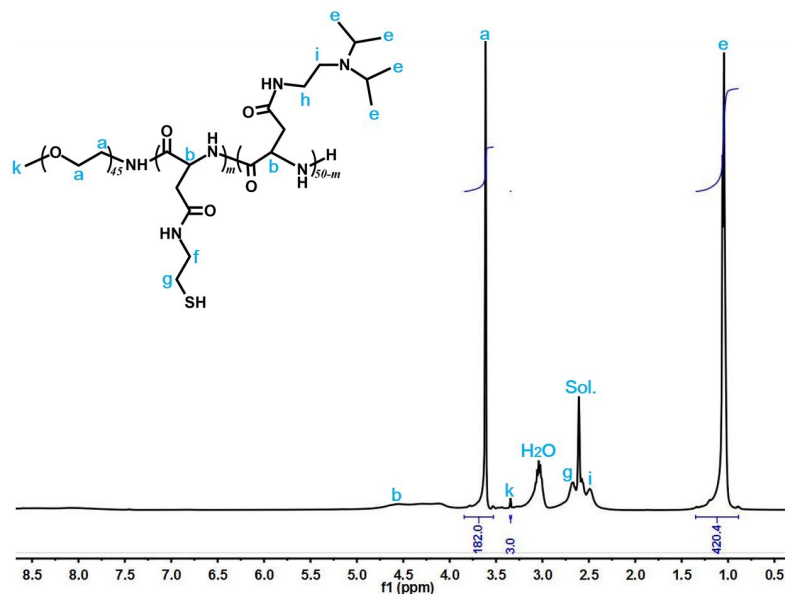

**Fig. S3** <sup>1</sup>H NMR spectrum of mPEG<sub>2k</sub>-PAsp(MEA&DIP)<sub>50</sub> in DMSO-d<sub>6</sub>. Characteristic peaks as follows: <sup>1</sup>H NMR (400 MHz, DMSO-d<sub>6</sub>, 298 K): δ (ppm) = 1.06 ppm ((CH<sub>3</sub>)<sub>2</sub>CH- of DIP, e), 2.49 ppm (-CH<sub>2</sub>-CH<sub>2</sub>-CH-(CH<sub>3</sub>)<sub>2</sub>- of DIP, i), 2.68 ppm (-CH<sub>2</sub>-CH<sub>2</sub>-SH of MEA, g), 3.34 ppm (CH<sub>3</sub>(OCH<sub>2</sub>CH<sub>2</sub>) NH-, k), 3.61 ppm (CH<sub>3</sub>(OCH<sub>2</sub>CH<sub>2</sub>) NH-, a), 4.55 ppm (-CH- of the main chain, b). Peak f and peak h are covered by the water peak.

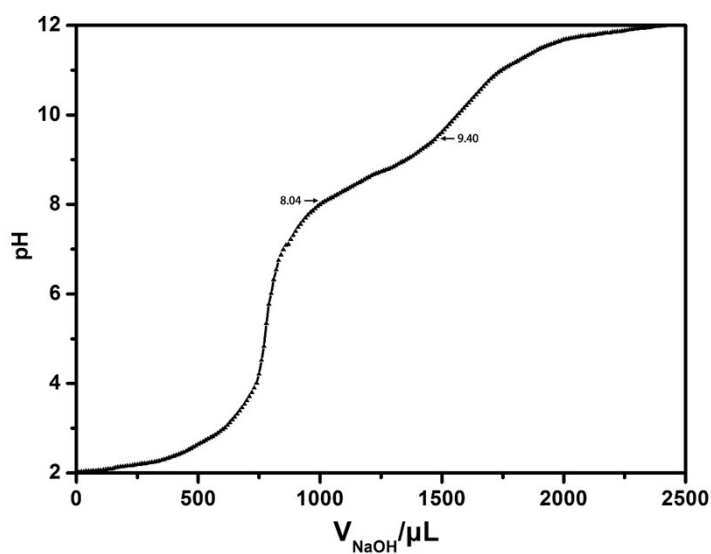

**Fig. S4** Acid–base titration curve of mPEG<sub>2k</sub>-PAsp(MEA&DIP)<sub>50</sub>. (NaOH concentration: 0.2 N).

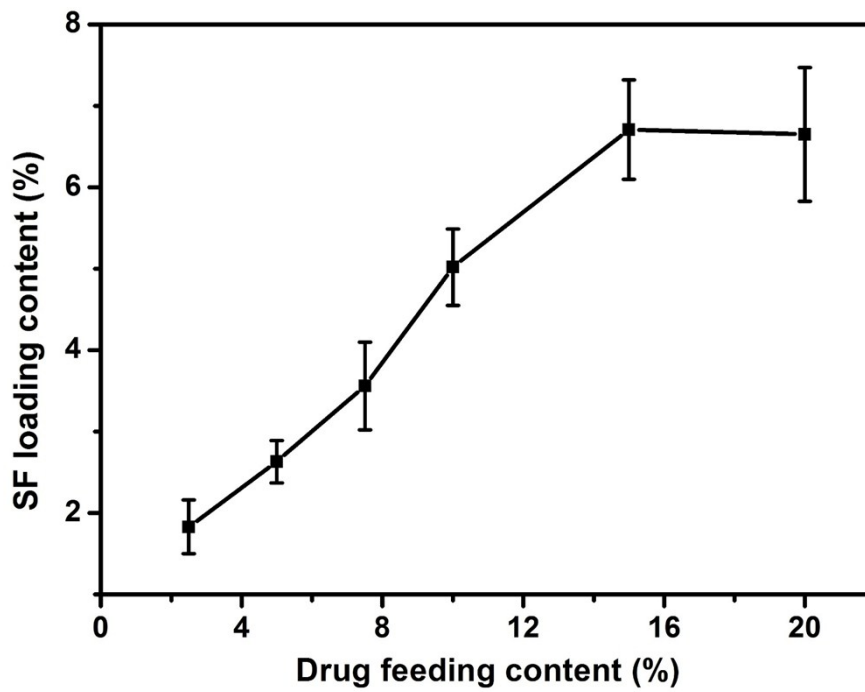

Fig. S5 SF loading contents of GPPSS prepared at different drug feeding contents.

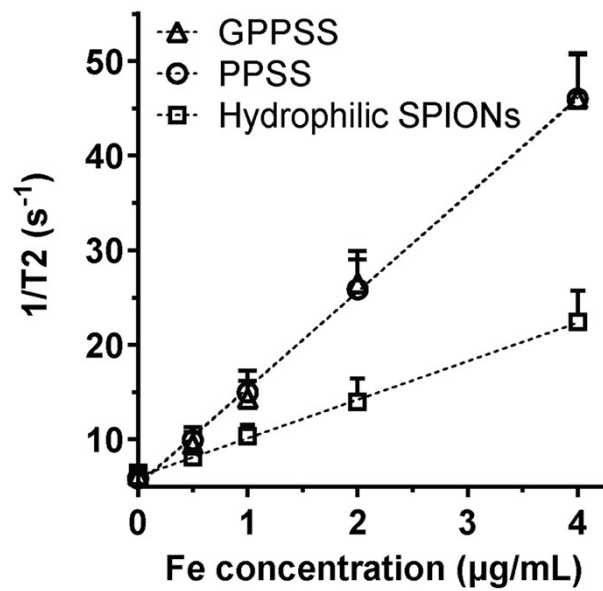

Fig. S6 T2 relaxivities of the micelles.

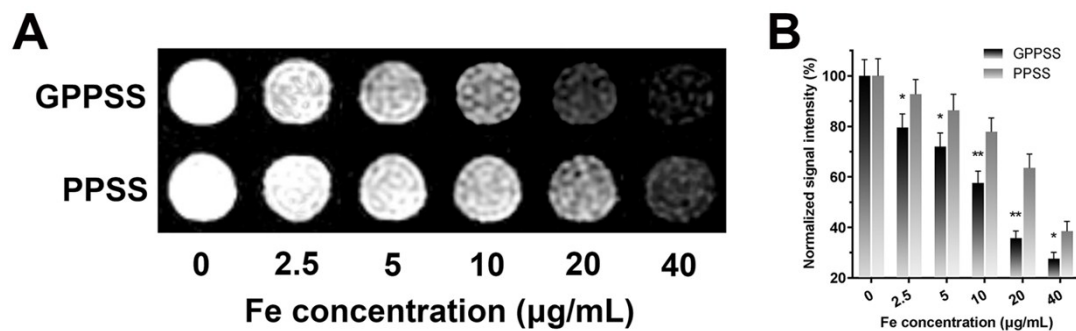

**Fig. S7 T2WI image of the HepG2 cell samples.** (A) T2WI images of HepG2 cells incubated with micelles at various Fe concentrations for 2 h. (B) Normalized signal intensities of cell samples on T2WI images (\* $P < 0.05$  and \*\* $P < 0.01$ , compared with PPSS).

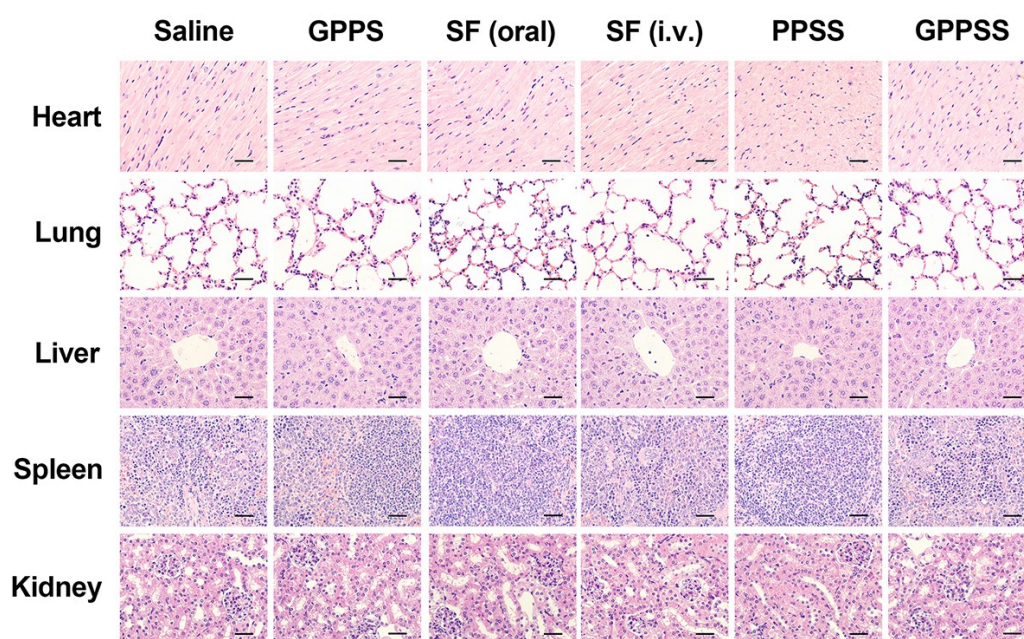

**Fig. S8 H&E staining images of major organs from the mice in different treatment groups** (scale bar: 20 µm).

**Table S1. The IC<sub>50</sub> values of micellar nanodrug for HepG2 cells**

| <b>Incubation time</b> | <b>IC<sub>50</sub> (μg mL<sup>-1</sup>)</b> |              |             |
|------------------------|---------------------------------------------|--------------|-------------|
|                        | <b>Free SF</b>                              | <b>GPPSS</b> | <b>PPSS</b> |
| 24 h                   | 4.55                                        | 4.99         | 9.05        |
| 48 h                   | 2.96                                        | 2.85         | 5.24        |
| 72 h                   | 1.93                                        | 1.79         | 3.54        |

IC<sub>50</sub>, half maximal inhibitory concentration.
